# Supplementary material for: Er 3+ -sensitized upconversion emission of Tm 3+ via Yb 3+ -mediated energy migration for nanothermometry
Source: Royal Society of Chemistry journal article supplement (doi:10.1039/d5tc00106d), 2025-01-01
Supplement: d5tc00106d1.pdf [file d5tc00106d1.pdf]

## Supporting information

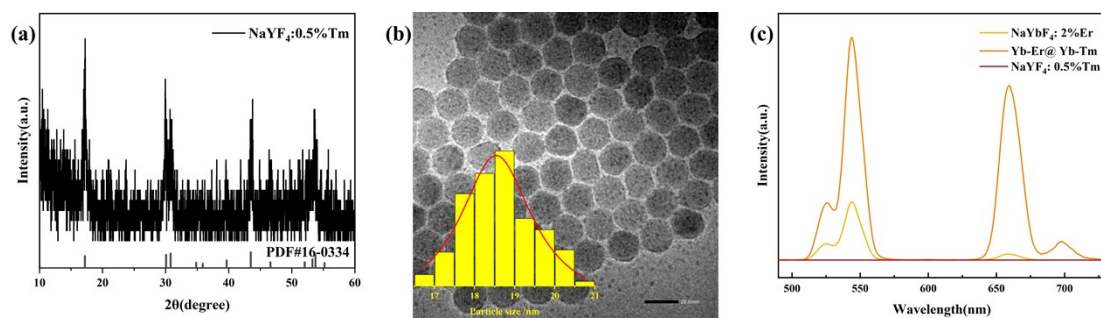

**S1.** (a) X-ray diffraction patterns of NaYF<sub>4</sub>:0.5%Tm<sup>3+</sup> UCNPs; (b) Transmission electron micrographs of NaYF<sub>4</sub>:0.5%Tm<sup>3+</sup> UCNPs are shown, with the inset displaying the statistical diagram of nanoparticle size for NaYF<sub>4</sub>:0.5%Tm<sup>3+</sup> UCNPs; and (c) The upconversion spectra of NaYbF<sub>4</sub>:2%Er<sup>3+</sup>, NaYbF<sub>4</sub>:2%Er<sup>3+</sup>@NaYbF<sub>4</sub>:0.5%Tm<sup>3+</sup> (Yb-Er@Yb-Tm) and NaYF<sub>4</sub>:0.5%Tm<sup>3+</sup> UCNPs ( $\lambda=1530$  nm, P=0.35 W).
